# Supplementary material
Source: MDPI journal article supplement (https://www.mdpi.com/2076-2615/11/11/3242)
Supplement: s1 [file s1]

Template for Innovations and best observed management practices

| Innovative and best observed management and production practices                 | Please, indicate with an "X" in the relevant row which are the practices that efficient farms apply the best/at full potential | Description                                                                                                                                                               |
|----------------------------------------------------------------------------------|--------------------------------------------------------------------------------------------------------------------------------|---------------------------------------------------------------------------------------------------------------------------------------------------------------------------|
| <b>A. Farm Management</b>                                                        |                                                                                                                                |                                                                                                                                                                           |
| A.1 Feeding                                                                      |                                                                                                                                |                                                                                                                                                                           |
| - Innovative Grazing Practices                                                   | X                                                                                                                              | e.g. "Implementation of high-throughput feed evaluation techniques"<br><br>e.g. "Set of criteria to evaluate grass state to decision making about rotating grazing plots" |
| - Increased Pasture Quality                                                      |                                                                                                                                | e.g. "Use of legumes and high sugar grass"                                                                                                                                |
| - Increased Forage Quality                                                       |                                                                                                                                |                                                                                                                                                                           |
| - Use of by-products to replace conventional feeds                               |                                                                                                                                |                                                                                                                                                                           |
| - Good understanding of matching animal requirements and supply (feed budgeting) | X                                                                                                                              | e.g. "Grouping animals with similar requirements"                                                                                                                         |
| - Use of additives                                                               | X                                                                                                                              | -                                                                                                                                                                         |
| - Other                                                                          |                                                                                                                                |                                                                                                                                                                           |
| A.2 Health                                                                       |                                                                                                                                |                                                                                                                                                                           |

|                                                                         |  |  |
|-------------------------------------------------------------------------|--|--|
| - Sound and scientific proven use of antibiotic alternatives in feeding |  |  |
| - Identification tests to spot animals with illness                     |  |  |
| - Use regionally integrated plans                                       |  |  |
| - Use of sensor RFID ear-tags as welfare indicators                     |  |  |
| - Cortisol Hair analysis                                                |  |  |
| - Other                                                                 |  |  |
| A.3 Reproduction                                                        |  |  |
| - Improved fertility through better quality of frozen semen             |  |  |
| - Assisted reproduction techniques                                      |  |  |
| - Improved/frequently reviewed of use of rams and reproduction plans    |  |  |
| - Other                                                                 |  |  |
| A.4 Breeding                                                            |  |  |
| - Routine data collection (i.e. milk yield/quality)                     |  |  |
| - Use of elite flocks                                                   |  |  |

|                                                                                           |  |  |
|-------------------------------------------------------------------------------------------|--|--|
| - System/criteria on place to choose best animals for replacement                         |  |  |
| - New traits to increase resilience and hardiness                                         |  |  |
| - DNA data collection and use in programs                                                 |  |  |
| - Other                                                                                   |  |  |
| A.5. Human resources organization                                                         |  |  |
| - Monitorization of labour costs/efficiency                                               |  |  |
| - Staff training courses / regular meetings to get feedback and keep positive stimulation |  |  |
| B. Farm Technology                                                                        |  |  |
| B.1 Information and Training                                                              |  |  |
| - Integrated and easy-to-use tools                                                        |  |  |
| - Access to abattoir feedback on carcass quality and health                               |  |  |
| - Tools to monitor BCS and pasture state                                                  |  |  |
| - Computer farm management programs                                                       |  |  |

|                                                                                                    |  |  |
|----------------------------------------------------------------------------------------------------|--|--|
| - Training on maximizing breeding programs and resources                                           |  |  |
| - Other                                                                                            |  |  |
| B.2 Gadgets/ Apps                                                                                  |  |  |
| - GPS control                                                                                      |  |  |
| - Drones                                                                                           |  |  |
| - Temporary electric fencing in mountainous areas                                                  |  |  |
| - Electric identification systems                                                                  |  |  |
| - On-farm data collection linked to animal ID and feedback to farmer to help decision making       |  |  |
| - Automatic animal handling                                                                        |  |  |
| - Animal stress automatic sensors                                                                  |  |  |
| - App to collect animal welfare indicators                                                         |  |  |
| - Electronic microchip readers and automatic milk recording systems for individual milk production |  |  |
| - Other                                                                                            |  |  |
| <b>C. Product Processing and Marketing</b>                                                         |  |  |

|                                                                                     |  |  |
|-------------------------------------------------------------------------------------|--|--|
| C.1 Product Processing                                                              |  |  |
| - Low fat / Omega 3 enriched products                                               |  |  |
| - Freeze drying for longer storage and exportation to China                         |  |  |
| - Goats milk                                                                        |  |  |
| - Vegetable rennet                                                                  |  |  |
| - New products                                                                      |  |  |
| - New smarter packaging                                                             |  |  |
| - New cuts / products                                                               |  |  |
| - Innovation to increase halal slaughtering                                         |  |  |
| - High standard animal welfare measures to improve quality of product at processing |  |  |
| - Stress free slaughter for improved meat quality                                   |  |  |
| - Other                                                                             |  |  |
| C.2 Product Marketing                                                               |  |  |
| - Promote fresh sheep and goat products                                             |  |  |

|                                                                                                      |  |  |
|------------------------------------------------------------------------------------------------------|--|--|
| - Better use of the environmental and social aspects of sheep farming in the marketing of sheep meat |  |  |
| - Branding and provenance of products for more local and direct markets                              |  |  |
| - Attractive branding, greater differentiation of product                                            |  |  |
| - Certification                                                                                      |  |  |
| - Other                                                                                              |  |  |
